# Supplementary material
Source: MDPI journal article supplement (https://www.mdpi.com/2073-4433/14/1/106)
Supplement: s1 [file s1]

*Article*

# Decreased Aircraft Takeoff Performance under Global Warming

Kun Wang <sup>1</sup>, Xianghua Peng <sup>1,\*</sup>, Bo Dan <sup>2,\*</sup>, Haiwen Liu <sup>1</sup>, Shanjun Cheng <sup>3</sup>, Ning Fu <sup>1</sup>, Hongli Fu <sup>2</sup> and Cong Liu <sup>1</sup>

<sup>1</sup> Department of Aviation Meteorology, Civil Aviation University of China, Tianjin 300300, China

<sup>2</sup> National Marine Data and Information Service, Tianjin 300012, China

<sup>3</sup> Tianjin Climate Center, Tianjin 300074, China

\* Correspondence: 2022031049@cauc.edu.cn (X.P.); danb2012@mail.bnu.edu.cn (B.D.)

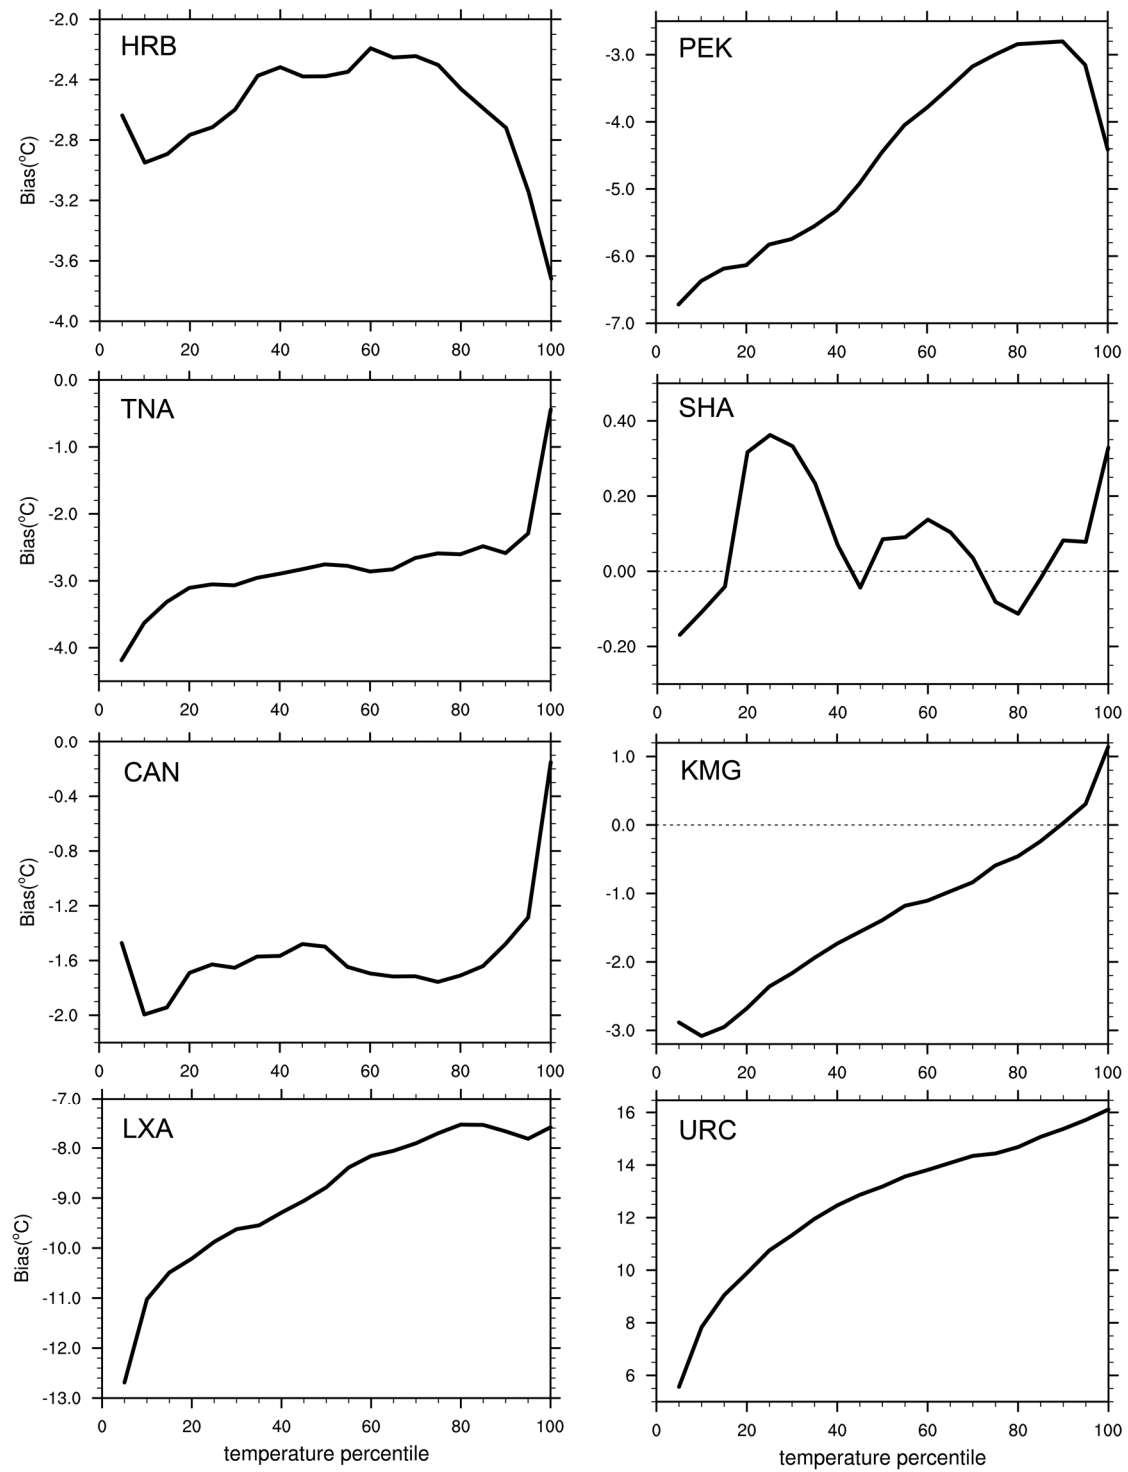

**Figure S1.** Bias correction (°C) applied to each 5% temperature percentile bin at the selected airports.

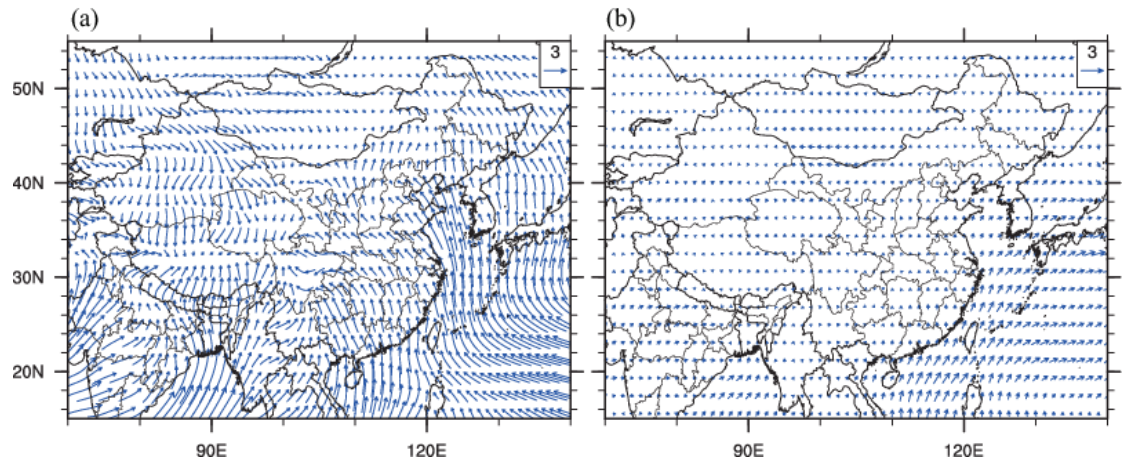

**Figure S2.** (a) Mean surface wind of summer in 1991–2000. (b) Surface wind anomalies of summer in 2071–2080 relative to 1991–2000 (m/s).
